# THE JOURNAL OF NEUROPSYCHIATRY and Clinical Neurosciences

The Official Journal of the American Neuropsychiatric Association

## In this issue:

- Does PTSD Impair Cognition Beyond the Effect of Trauma?
- A Review of the Brain Structure Correlates of Successful Cognitive Aging
- Anxiety Disorders in Children and Adolescents in the First Six Months After Traumatic Brain Injury
- Impact of Playing American Professional Football on Long-Term Brain Function
- Social Cognition, Executive Function and Neuroimaging Correlates of Empathic Deficits in Frontotemporal Dementia

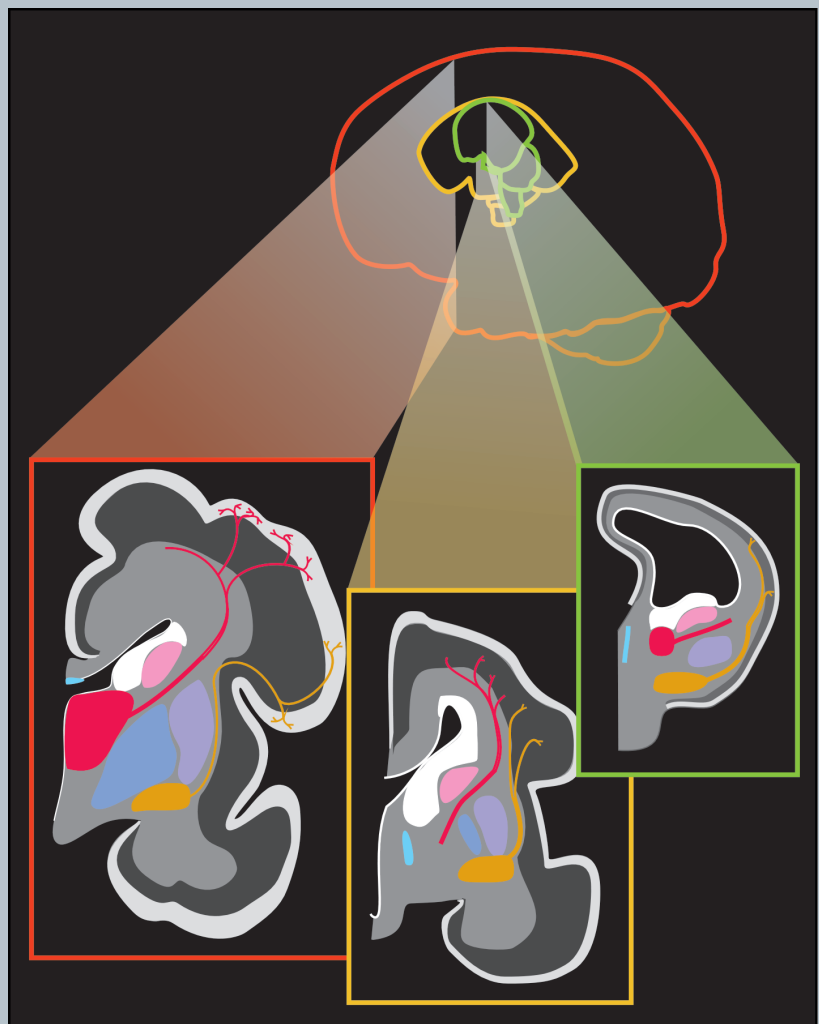

Source: https://neuro.psychiatryonline.org/doi/suppl/10.1176/jnp.2011.23.issue-1/suppl_file/cover.pdf
