THE  
JOURNAL OF  
NEUROPSYCHIATRY  
and Clinical Neurosciences

VOLUME 23 • NUMBER 1 • WINTER 2011

---

WINDOWS TO THE BRAIN

- iv Developmental Origins for Neuropsychiatric Illness  
*Katherine H. Taber, Ph.D., Jay Salpekar, M.D.,  
Albert H. C. Wong, M.D., Ph.D., Robin A. Hurley, M.D.*

---

SPECIAL ARTICLES

- 6 A Review of the Brain Structure Correlates of Successful Cognitive Aging  
*Allison R. Kaup, M.S., Helene Mirzakhanian, Ph.D., Dilip V. Jeste, M.D.,  
Lisa T. Eyler, Ph.D.*
- 16 Does PTSD Impair Cognition Beyond the Effect of Trauma?  
*Salah U. Qureshi, M.D., Mary E. Long, Ph.D.,  
Major R. Bradshaw, Ph.D., Jeffrey M. Pyne, M.D.,  
Kathy M. Magruder, M.P.H., Ph.D., Timothy Kimbrell, M.D.,  
Teresa J. Hudson, Pharm.D., Ali Jawaaid, M.B.B.S., Paul E. Schulz, M.D.,  
Mark E. Kunik, M.D., M.P.H.*

---

REGULAR ARTICLES

- 29 Anxiety Disorders in Children and Adolescents in the First Six Months After Traumatic Brain Injury  
*Jeffrey E. Max, M.B.B.Ch., Eva Keatley, B.S., Elisabeth A. Wilde, Ph.D.,  
Erin D. Bigler, Ph.D., Harvey S. Levin, Ph.D., Russell J. Schachar, M.D.,  
Ann Saunders, M.D., Linda Ewing-Cobbs, Ph.D.,  
Sandra B. Chapman, Ph.D., Maureen Dennis, Ph.D.,  
Tony T. Yang, M.D., Ph.D.*
- 40 Repetitive Transcranial Magnetic Stimulation and Threat Memory: Selective Reduction of Combat Threat Memory P300 Response After Right Frontal-Lobe Stimulation  
*Gail D. Tillman, Ph.D., Timothy A. Kimbrell, M.D.,  
Clifford S. Calley, B.S., Michael A. Kraut, M.D. Ph.D.,  
Thomas W. Freeman, M.D., John Hart, Jr., M.D.*
- 48 The Parkinsonian Personality and Concomitant Depression  
*Malene Flensburg Damholdt, M.Sc., Ph.D.,  
Karen Østergaard, M.D., Ph.D., D.Msc., Per Borghammer, M.D., Ph.D.,  
Lars Larsen, M.Sc., Ph.D.*

- 56 Binge Eating in Parkinson's Disease: Prevalence, Correlates and the Contribution of Deep Brain Stimulation  
*Laura B. Zahodne, M.S., Frandy Susatia, M.D., Dawn Bowers, Ph.D., Tiara L. Ong, B.A., Charles E. Jacobson IV, B.S., Michael S. Okun, M.D., Ramon L. Rodriguez, M.D., Irene A. Malaty, M.D., Kelly D. Foote, M.D., Hubert H. Fernandez, M.D.*
- 63 SPECT Imaging of Dopamine Transporters With <sup>99m</sup>Tc-TRODAT-1 in Major Depression and Parkinson's Disease  
*Hao Wu, M.D., Cen Lou, M.D., Zhongke Huang, M.D., Guohua Shi, M.D.*
- 68 Soft Neurological Signs in Drug-Free People With Schizophrenia With and Without Obsessive-Compulsive Symptoms  
*Naveen Thomas, M.D., Prathap Tharyan, M.D.*
- 74 Social Cognition, Executive Functioning, and Neuroimaging Correlates of Empathic Deficits in Frontotemporal Dementia  
*Paul J. Eslinger, Ph.D., Peachie Moore, B.S., Chivon Anderson, B.S., Murray Grossman, M.D., Ph.D.*
- 83 HIV and Age Do Not Substantially Interact in HIV-Associated Neurocognitive Impairment  
*Lucette A. Cysique, Ph.D., Paul Maruff, Ph.D., Margaret P. Bain, M.Clin.Neuropsych, Edwina Wright, M.B.B.S., F.R.A.C.P., Bruce J. Brew, M.B.B.S., M.D., F.R.A.C.P.*

---

## NEUROPSYCHIATRIC PRACTICE AND OPINION

- 90 The Emerging Link Between Autoimmune Disorders and Neuropsychiatric Disease  
*Matthew S. Kayser, M.D., Ph.D., Josep Dalmau, M.D., Ph.D.*

---

## CLINICAL AND RESEARCH REPORTS

- 98 Impact of Playing American Professional Football on Long-Term Brain Function  
*Daniel G. Amen, M.D., Andrew Newberg, M.D., Robert Thatcher, Ph.D., Yi Jin, M.D., Joseph Wu, M.D., David Keator, M.C.S., Kristen Willeumier, Ph.D.*
- 107 Abnormal Structural Correlates of Response Perseveration in Individuals With Psychopathy  
*Yaling Yang, Ph.D., Adrian Raine, D. Phil., Patrick Colletti, M.D., Arthur W. Toga, Ph.D., Katherine L. Narr, Ph.D.*

- 111** Frontal Brain Oscillatory Coupling in Children of Parents With Social Phobia: A Pilot Study  
*Vladimir Miskovic, B.A., Mira J. Campbell, B.A., Diane L. Santesso, Ph.D., Michael Van Ameringen, M.D., Catherine L. Mancini, M.D., Louis A. Schmidt, Ph.D.*

---

DEPARTMENTS

**115** Letters

*Information for Contributors is available online at  
<http://neuro.psychiatryonline.org>*

# WINDOWS TO THE BRAIN

Robin A. Hurley, M.D., L. Anne Hayman, M.D., Katherine H. Taber, Ph.D.

Section Editors

## Developmental Origins for Neuropsychiatric Illness

Katherine H. Taber, Ph.D., Jay Salpekar, M.D., Albert H. C. Wong, M.D., Ph.D.  
Robin A. Hurley, M.D.

**FIGURE 1.** The neural tube (illustrated in schematic form) expands locally to form the three primary divisions or vesicles (left).<sup>1</sup> These, in turn, form the five secondary divisions (middle). The forebrain vesicle (prosencephalon [yellow]) subdivides into telencephalon (yellow) and diencephalon (light green). The hindbrain vesicle (rhombencephalon [purple]) subdivides into the metencephalon (blue) and myelencephalon (pink). The areas of brain that each of these becomes are listed and color-coded onto a sagittal MRI (right).

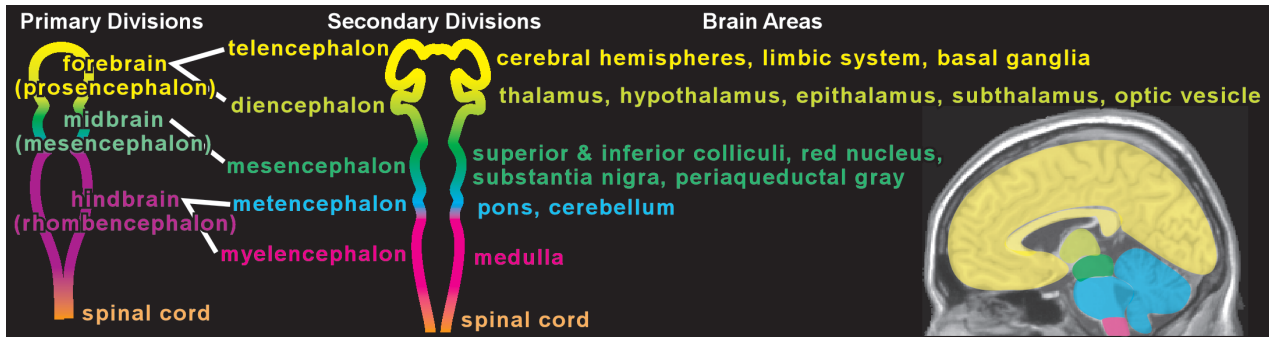

**COVER and FIGURE 2.** Major phases in prenatal development of the cerebrum are illustrated on schematics of coronal brain sections.<sup>2-8</sup> The approximate locations of sections are indicated on drawings of brains color-coded as in Figure 1. Note that the change in shape of the cerebral hemispheres, although often described as rotation, is actually a result of cortical expansion, with little movement of the frontal and temporal poles. In the early fetal phase (left) subcortical nuclei and their associated fiber tracts are already well along in development. Axons from brainstem (not illustrated) and basal forebrain (gold) have made synaptic contact in the regions above the cortical plate (marginal zone, not illustrated) and below the cortical plate (presubplate or subplate, dark gray), whereas most thalamocortical axons (red) have not yet passed through the corticostriatal junction. Thalamocortical axons make synaptic contact in the subplate in the midfetal phase (middle). All of these axons wait in the subplate until the early preterm phase (right), when they invade the cortical plate and establish synaptic contacts.

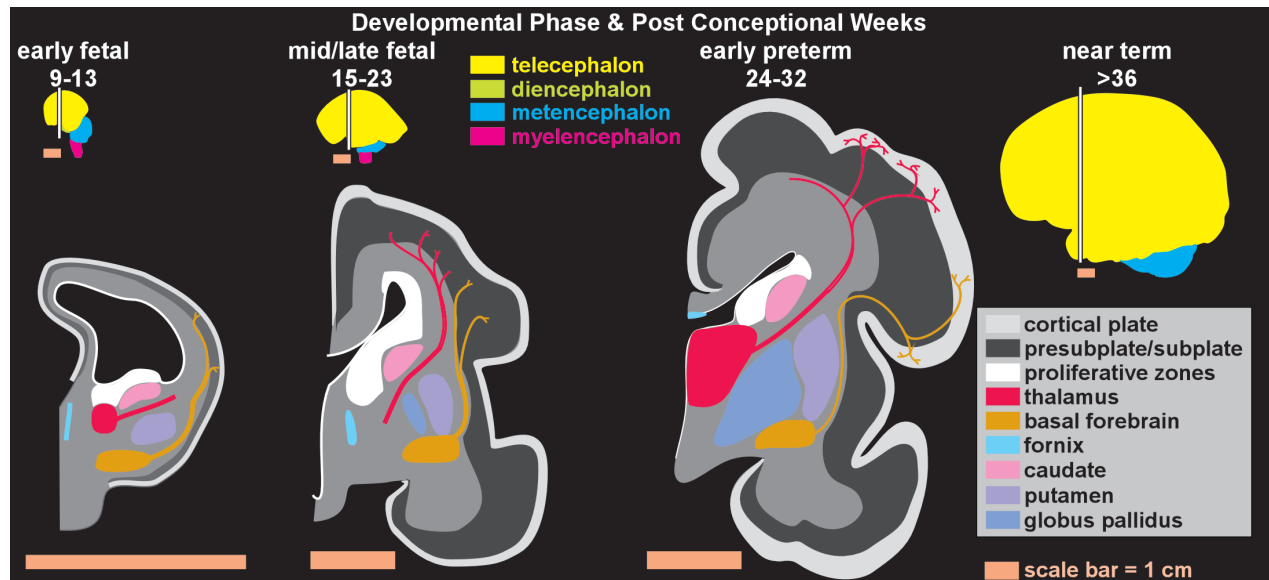

Source: https://neuro.psychiatryonline.org/doi/suppl/10.1176/jnp.2011.23.issue-1/suppl_file/front.pdf
